# Supplementary material
Source: PubMed Central journal article supplement (PMC7946719)
Supplement: NIHMS1658636-supplement-1.pdf [file NIHMS1658636-supplement-1.pdf]

## Smaller Regional Brain Volumes Predict Posttraumatic Stress Disorder at 3 Months After Mild Traumatic Brain Injury

### *Supplement*

Supplemental Table S1. Multivariable logistic regression model assessing the association between risk factors and PTSD at 6-months post-injury (n=405).

|                                        | OR   | 95% CI      | Chi-sq | p-value |
|----------------------------------------|------|-------------|--------|---------|
| PC1                                    | 0.86 | 0.65-1.13   | 1.20   | .27     |
| ICV (standardized)                     | 1.10 | 0.65-1.84   | 0.12   | .73     |
| Male (ref: Female)                     | 0.97 | 0.42-0.2.26 | 0.00   | .95     |
| Black (ref: White/Other)               | 1.96 | 0.82-4.67   | 2.27   | .13     |
| Hispanic (ref: non-Hispanic)           | 1.06 | 0.40-2.84   | 0.01   | .91     |
| Years of Education                     | 0.89 | 0.77-1.02   | 2.76   | .10     |
| Any psychiatric history (ref: None)    | 2.08 | 0.91-4.75   | 3.02   | .08     |
| Any prior TBI (ref: None)              | 1.36 | 0.67-2.74   | 0.72   | .40     |
| Violent injury cause (ref: Accidental) | 1.56 | 0.45-5.47   | 0.49   | .49     |
| PCL-5 Total Score at week 2            | 1.08 | 1.06-1.10   | 56.48  | <0.0005 |
